# Supplementary material for: Heterometallic 20-membered {Fe16Ln4} (Ln = Sm, Eu, Gd, Tb, Dy, Ho) metallo-ring aggregates
Source: Royal Society of Chemistry journal article supplement (doi:10.1039/c0dt01742f), 2011-01-01
Supplement: c0dt01742f.pdf [file c0dt01742f.pdf]

## Supplementary information

# Heterometallic 20-Membered $\{\text{Fe}_{16}\text{Ln}_4\}$ (Ln = Sm, Eu, Gd, Tb, Dy, Ho) Metallo-Ring Aggregates

Amer Baniodeh, Ian J. Hewitt, Valeriu Mereacre, Yanhua Lan, Ghenadie Novitchi, Christopher E. Anson, and Annie K. Powell\*

*Institute of Inorganic Chemistry, Karlsruhe Institute of Technology, Engesserstr. 15, D-76131 Karlsruhe, Germany*

### Magnetic measurements:

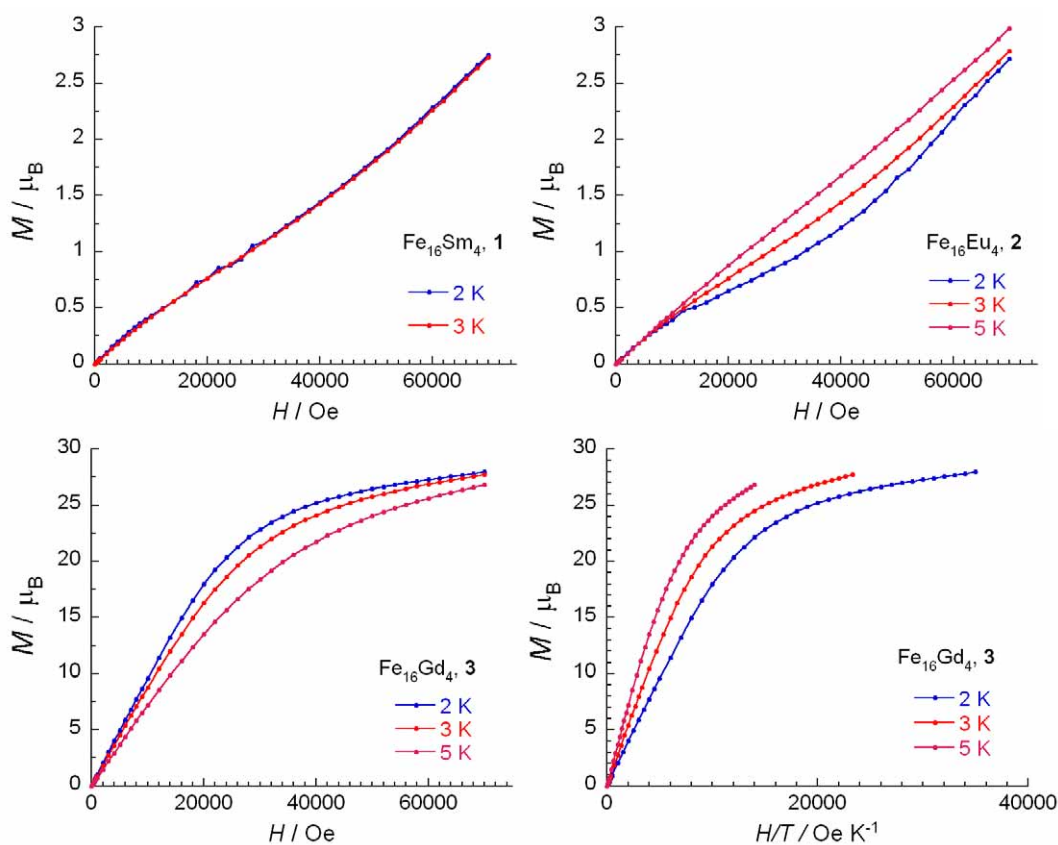

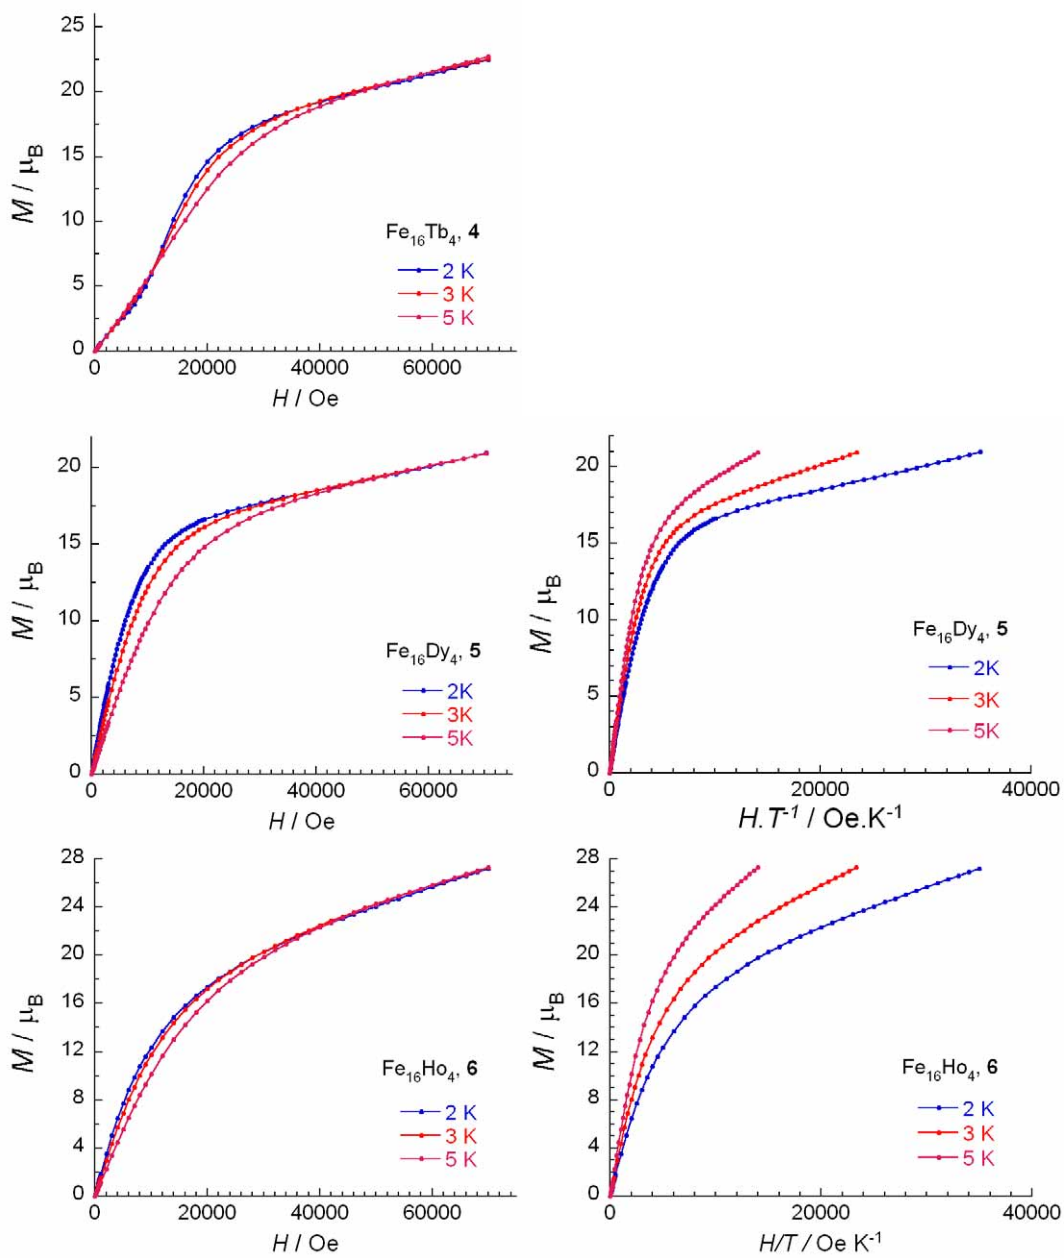

**Figure S1.** The field dependence of magnetisation of compounds 1 - 6 at indicated temperatures.

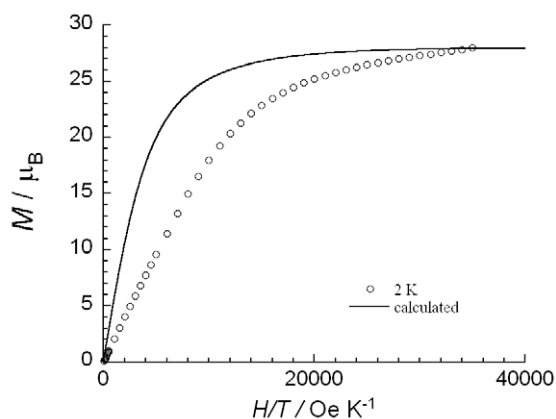

**Figure S2:** Field dependence of experimental magnetisation of **3** (open circles) together with the calculated magnetisation for the uncoupled sum of 4  $S=7/2$  spins assuming  $g=2.0$  (solid line).

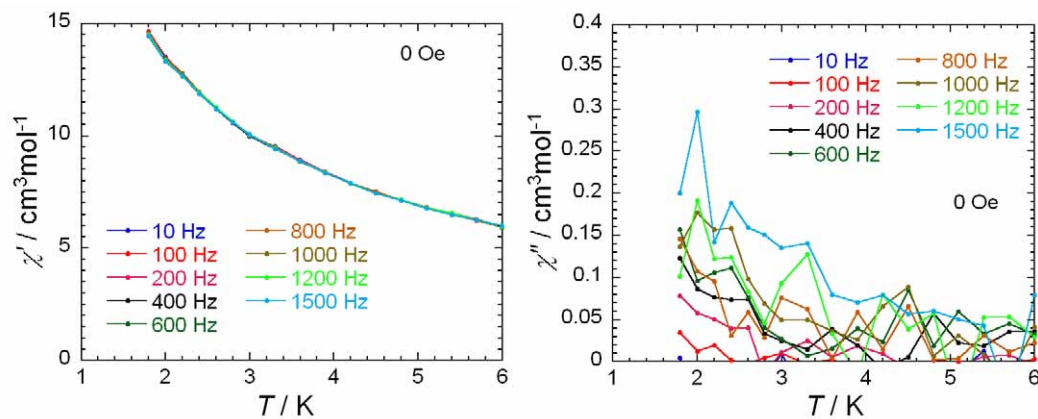

**Figure S3.** Temperature dependence of the in-phase and the out-of-phase ac susceptibility components at different frequencies under zero dc field for  $\text{Fe}_{16}\text{Dy}_4$ , **5**.

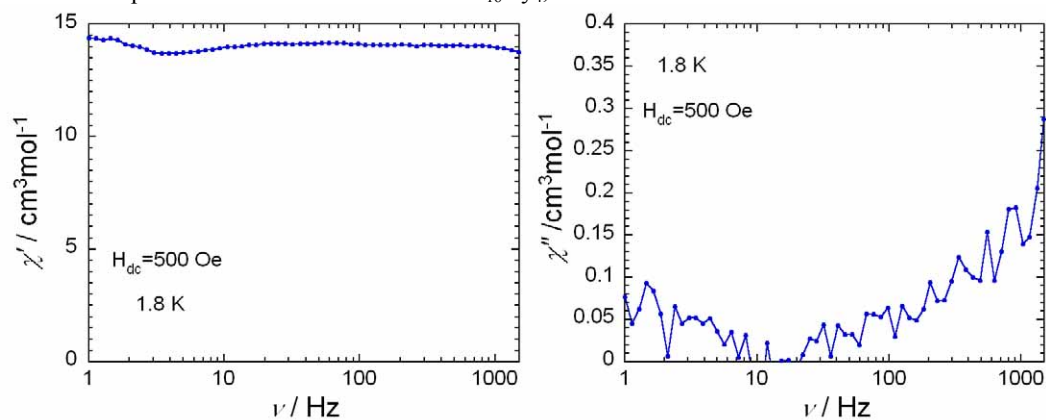

**Figure S4.** Frequency dependence of the in-phase and the out-of-phase ac susceptibility components at 1.8 K under a dc field of 500 Oe for  $\text{Fe}_{16}\text{Dy}_4$ , **5**.
